# Supplementary material for: The antiproliferative ELF2 isoform, ELF2B, induces apoptosis in vitro and perturbs early lymphocytic development in vivo
Source: Springer Nature journal article supplement (doi:10.1186/s13045-017-0446-7), 2017-03-28

# Supplementary Figure 2

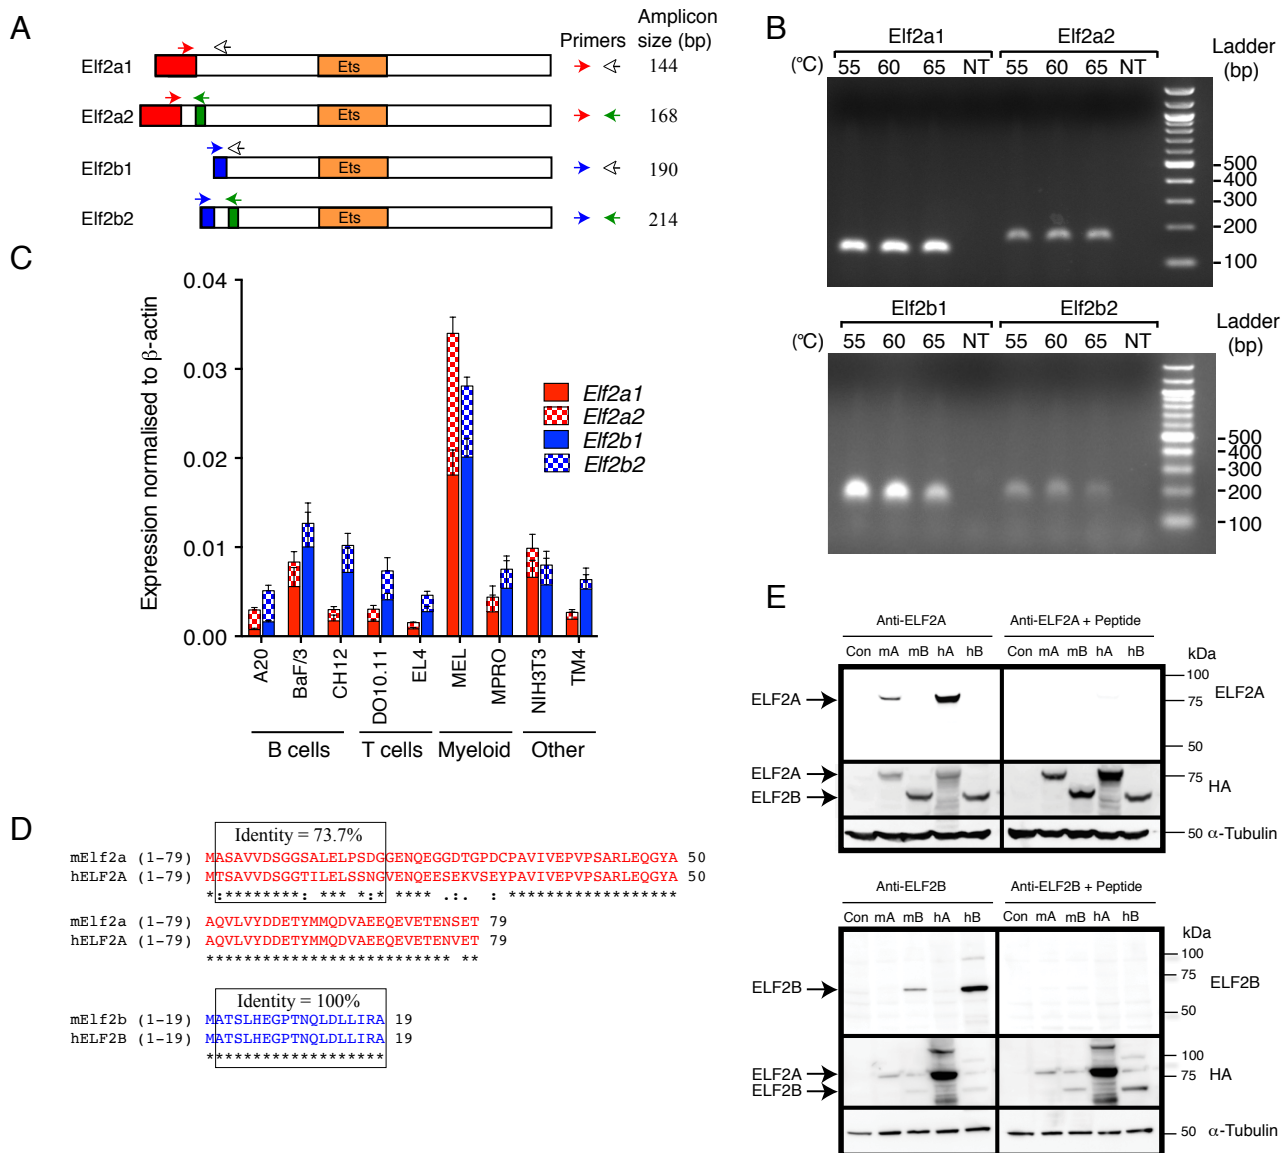

Supplement: MOESM5 [file 12183126]
